# Supplementary material
Source: Springer Nature journal article supplement (https://www.springermedizin.de/resource/supplementary/12879_2010_1737_MOESM2_ESM.pdf/9443216)

N

## Spoligopatterns

SIT

Label

15

10

5

3

3

3

3

3

3

2

2

2

2

2

2

2

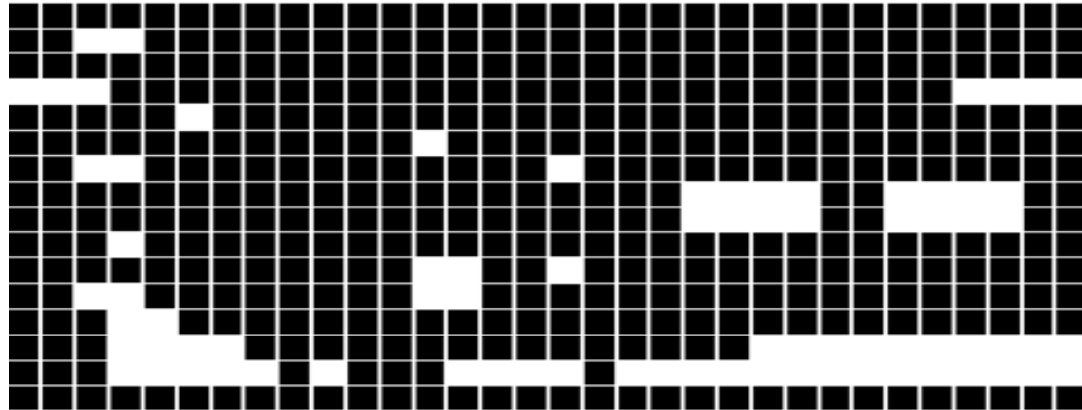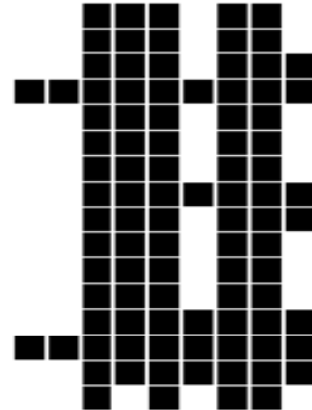

135

NA

52

1090

NA

NA

128

59

815

NA

NA

NA

358

26

NA

NA

T2

T2

EAI5

T2

LAM11\_ZWE

LAM11\_ZWE

T1

CAS\_DELHI

Supplement: MOESM2 [file 9443216]
